# Supplementary material for: Asaia Activates Immune Genes in Mosquito Eliciting an Anti-Plasmodium Response: Implications in Malaria Control
Source: PubMed Central journal article supplement (PMC6774264; doi:10.3389/fgene.2019.00836), 2019-09-25
Supplement: Image_1.pdf [file Image_1.pdf]

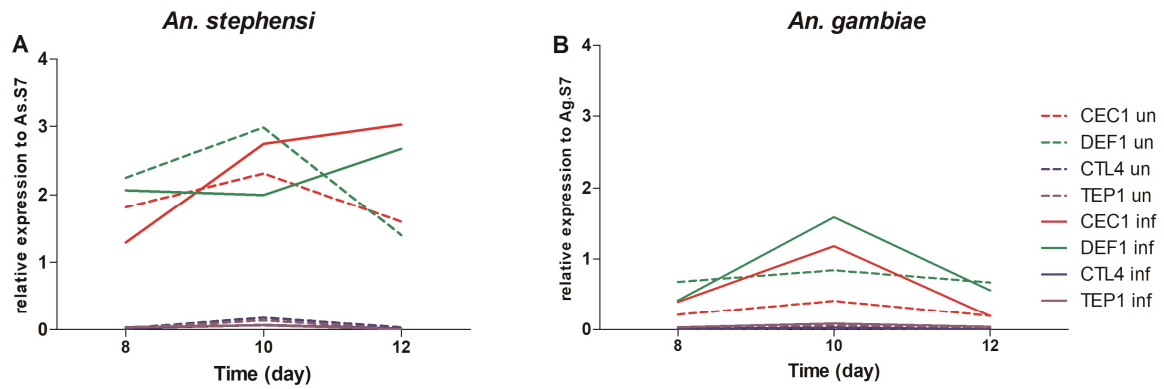

**Fig. S1.** Relative expression of immune genes in *An. stephensi* and *An. gambiae* administrated with sugar diet after uninfected and *P. berghei*-infected blood meal. Graphic representation of related modulation of different immune effectors after uninfected and infected blood meal (A and B) in mosquitoes fed on 5% sugar solution. Shown values represent the relative genes expression normalized on the reference gene Rps7. Scattered lines: uninfected blood meal, full lines: infected blood meal.
