# Supplementary material for: Asaia Activates Immune Genes in Mosquito Eliciting an Anti-Plasmodium Response: Implications in Malaria Control
Source: PubMed Central journal article supplement (PMC6774264; doi:10.3389/fgene.2019.00836), 2019-09-25
Supplement: Image_3.pdf [file Image_3.pdf]

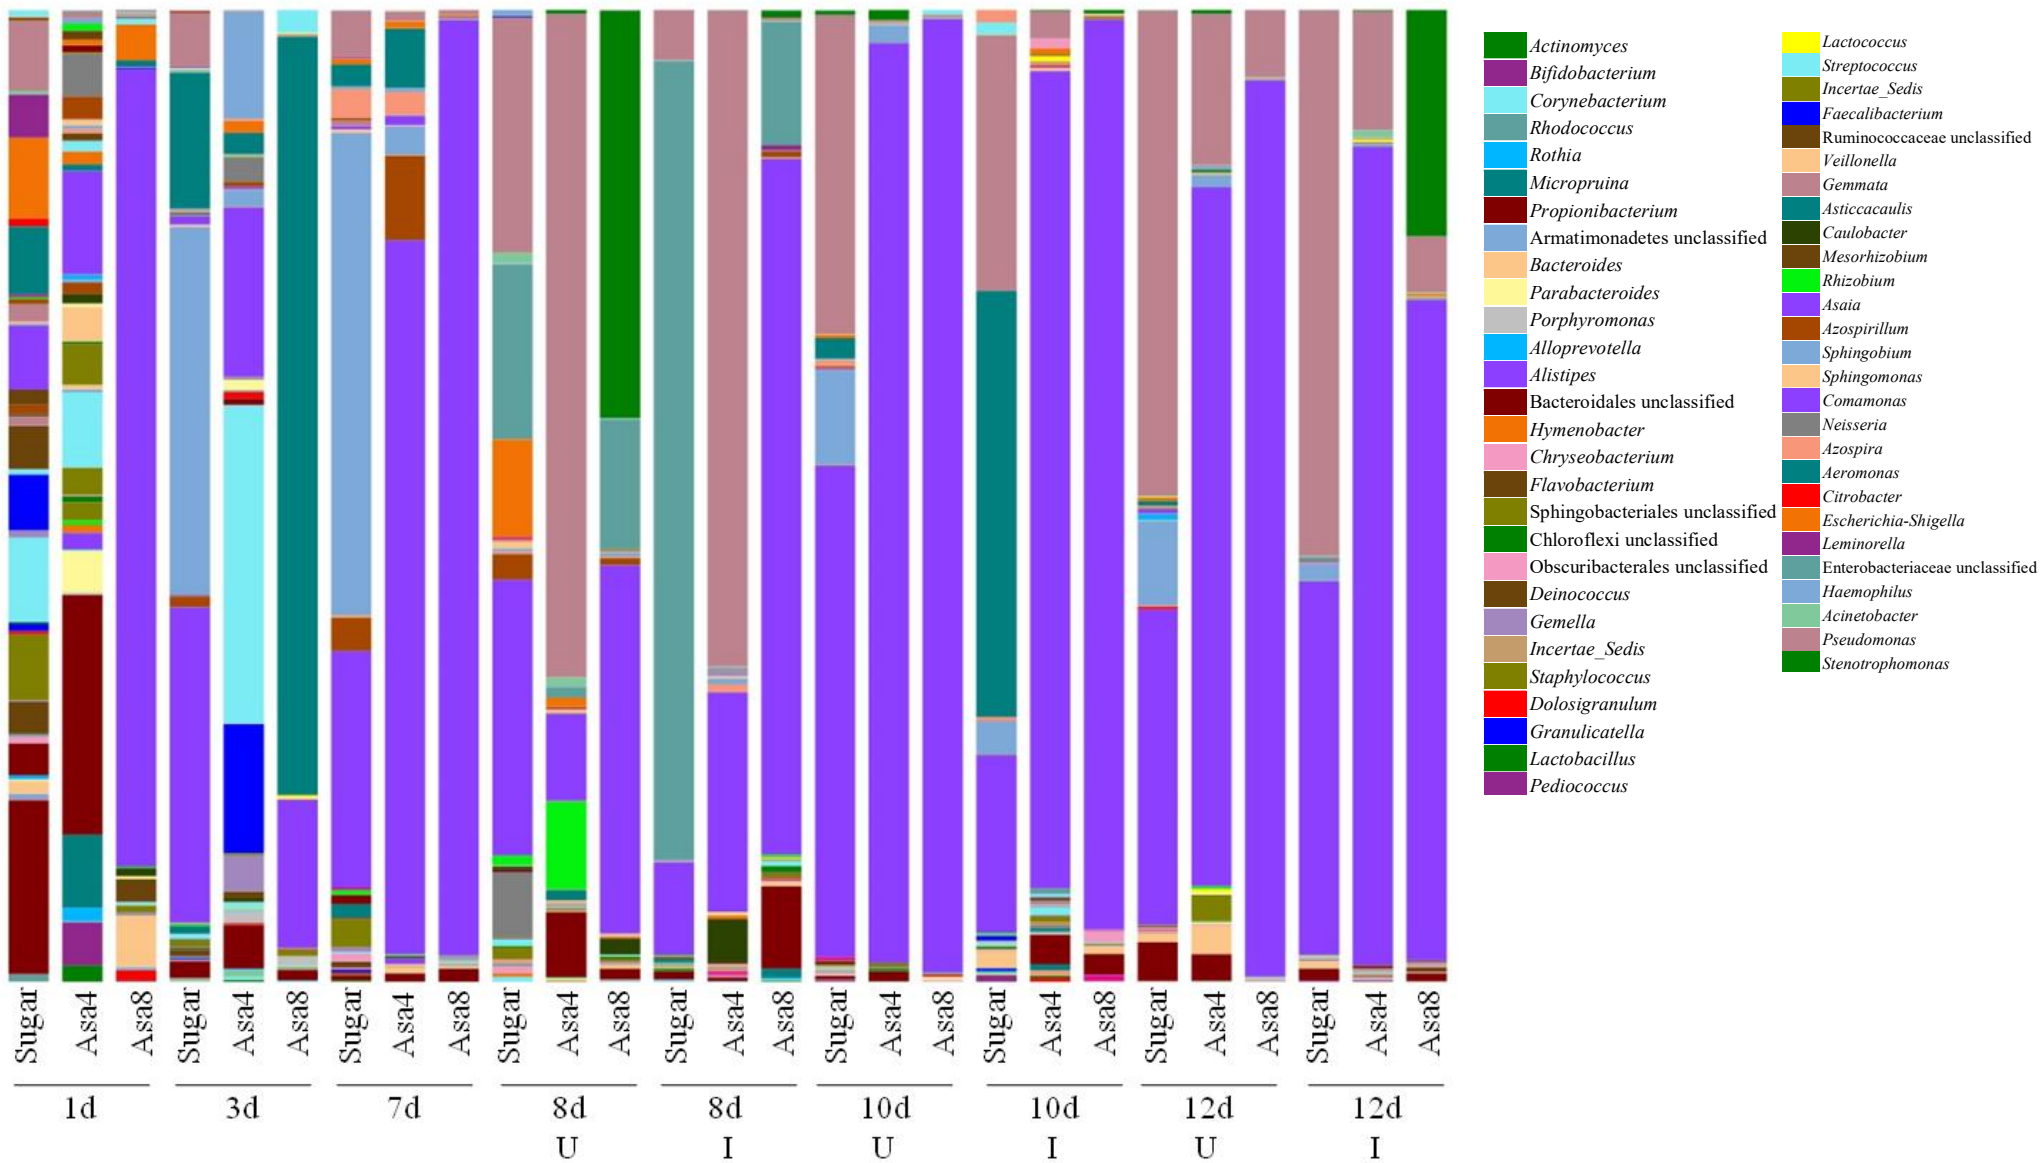

**Fig. S3.** Genus level composition (% of OTUs) in *An. stephensi* mosquitoes fed on different diet and different blood meal: uninfected (U) or infected (I).
